# Supplementary material
Source: PubMed Central journal article supplement (PMC7381372)
Supplement: NIHMS1605973-supplement-Supp_FigS1.pdf [file NIHMS1605973-supplement-Supp_FigS1.pdf]

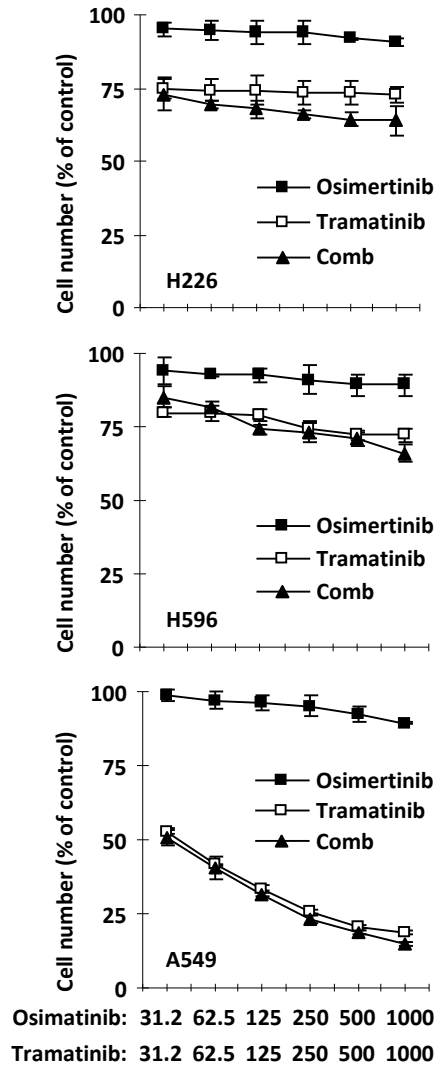

**Fig. S1. The combination of osimertinib with trametinib does not further decrease the survival of NSCLC cells lines with WT EGFR.** The indicated cell lines plated in 96-well plates were exposed to the varied concentrations of osimertinib alone, trametinib or or their respective combinations. After 3 days, cell numbers were estimated using the SRB assay. The data are means  $\pm$  SDs of four replicate determinations.
