# Supplementary material
Source: PubMed Central journal article supplement (PMC7381372)
Supplement: NIHMS1605973-supplement-Supp_FigS2.pdf [file NIHMS1605973-supplement-Supp_FigS2.pdf]

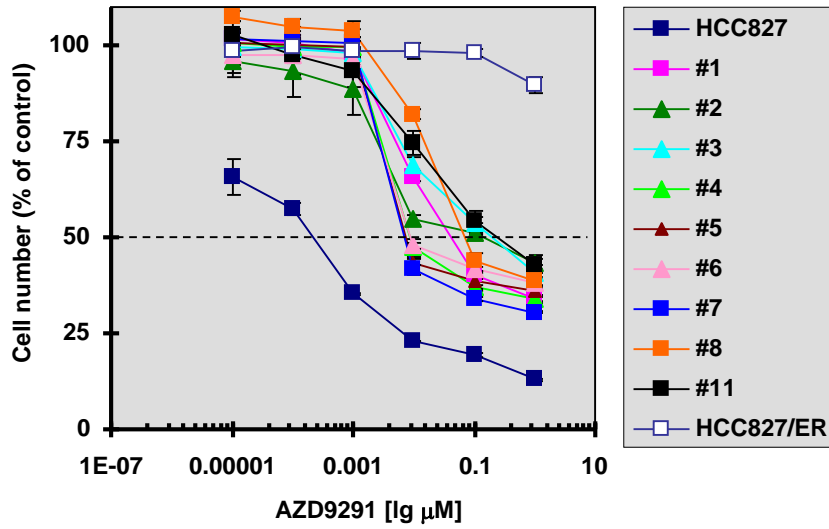

**Fig. S2. Survival clones from HCC827 cells treated with one-time high concentration of osimertinib exhibit resistance to osimertinib.** The procedure for this study was basically same as described in Fig. 3B. HCC827, its derived clones as indicated and HCC827/ER (erlotinib-resistant) were seeded in 96-well plates and treated with different concentrations of osimertinib for 3 days. Cell numbers were estimated with the SRB assay.
